# Supplementary material
Source: PubMed Central journal article supplement (PMC9170772)

**A**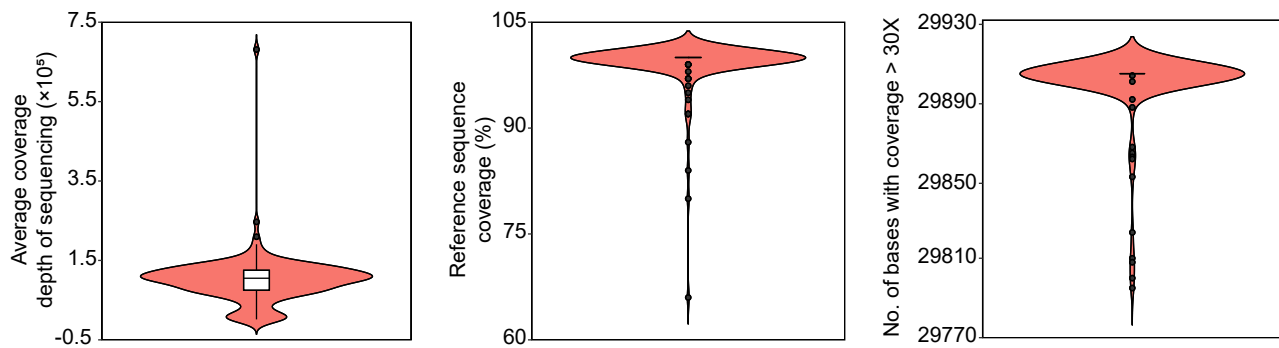**B**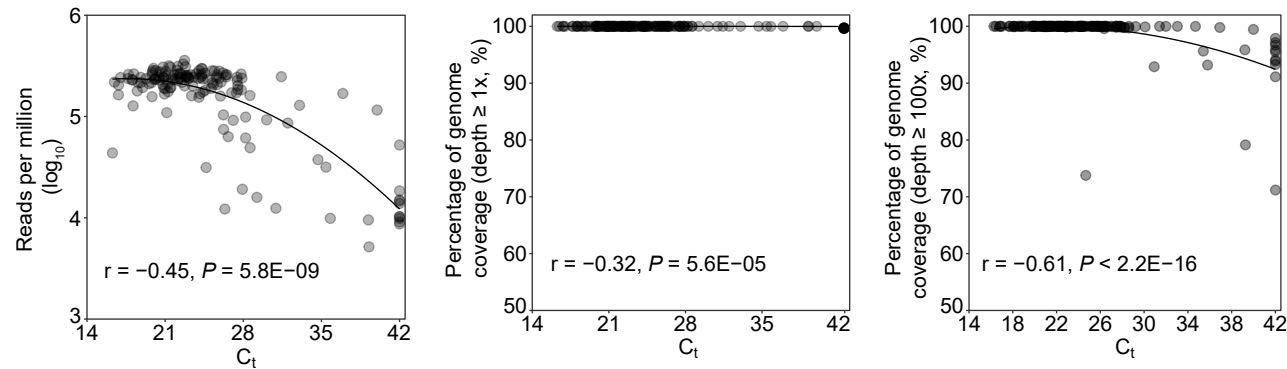**C**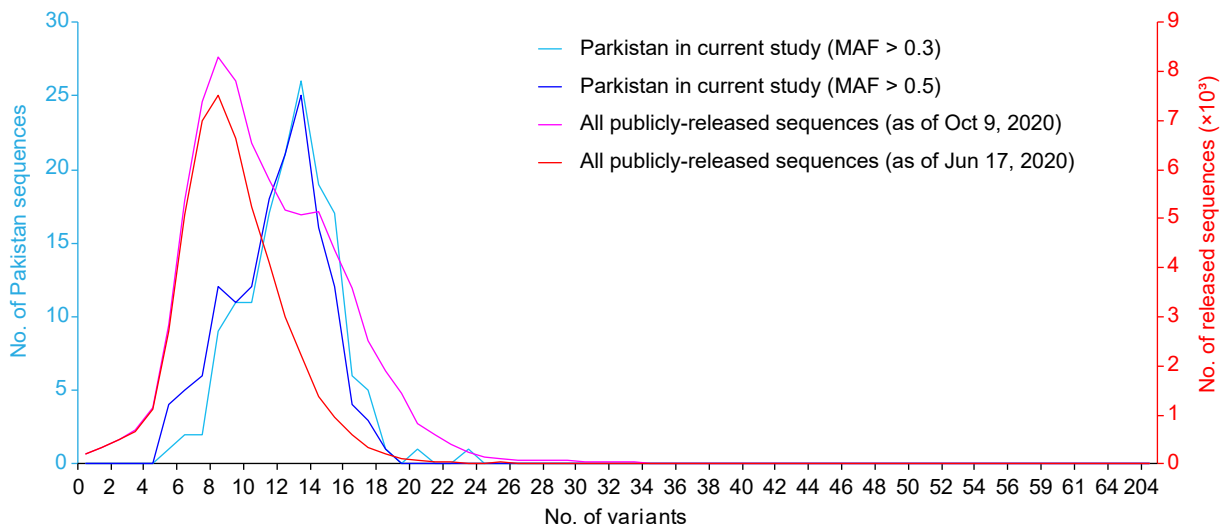

Supplement: mmc3.pdf [file mmc3.pdf]
