# Supplementary material
Source: PubMed Central journal article supplement (PMC9170772)

**A**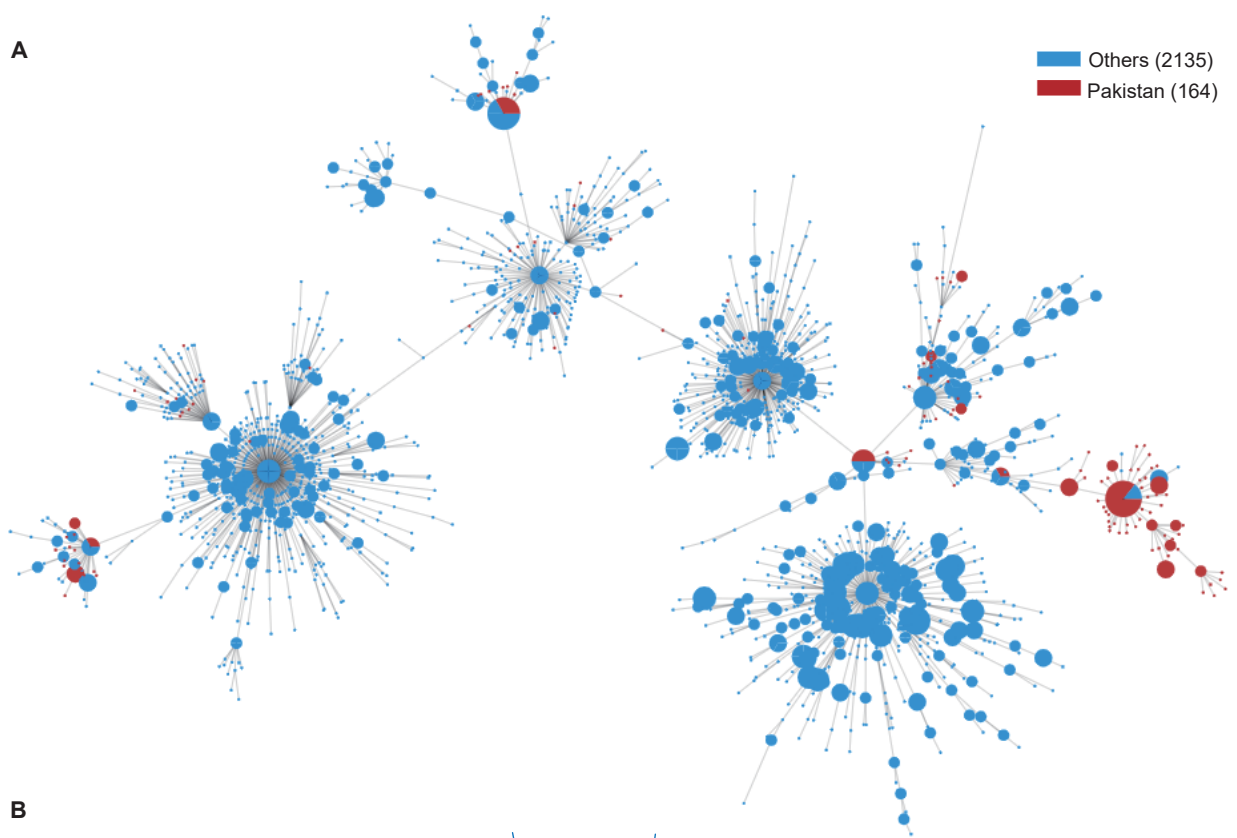**B**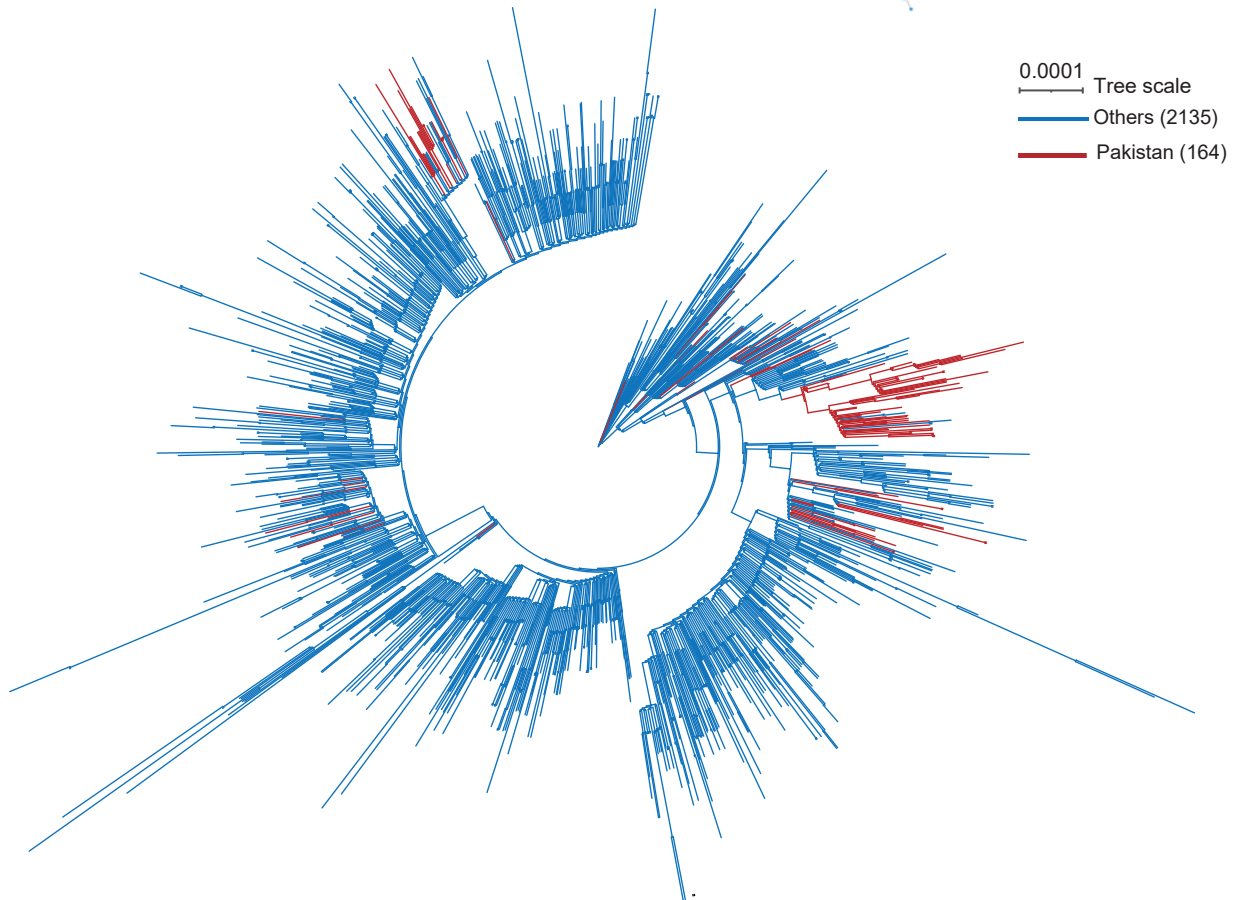

Supplement: mmc4.pdf [file mmc4.pdf]
